# Supplementary material for: P2Y2R-Mediated PAK1 Activation Is Involved in ESM-1 Overexpression in RT-R-MDA-MB-231 through FoxO1 Regulation
Source: Cancers (Basel). 2022 Aug 26;14(17):4124. doi: 10.3390/cancers14174124 (PMC9454712; doi:10.3390/cancers14174124)
Supplement: Supplementary file 1 [file cancers-14-04124-s001.zip › Intensity ratios of bands (Jin et al, Cancers).xlsx]

## Sheet: Fig1A
n=1			ESM-1	GAPDH	ESM-1/GAPDH	Fold of control			MDA	RT-R-MDA
	MDA	CTRL	1626.36	20114.5	0.0808553	1			CTRL	CTRL	Dig	Bay	SR	AS	AG
	RT-R-MDA	CTRL	16572.4	19825.8	0.8359	10.3382		n=1	1	10.3382	10.7912	10.1379	6.33322	5.10517	10.4255
		Dig	17484.7	20039.1	0.872528	10.7912		n=2	1	10.2591	9.33975	12.1456	13.1841	4.75196	12.4527
		Bay	16349.1	19945.2	0.8197	10.1379		n=3	1	11.1976	12.5384	13.9901	10.9999	4.24326	14.6235
		SR	9650.67	18846.2	0.512075	6.33323		n=4	1	12.0669	19.3835	17.9739	12.4345	1.53765	17.8884
		AS	7688.96	18627.3	0.41278	5.10517		n=5	1	13.5222	17.8238	17.2128	15.5855	7.58194	15.1738
		AG	15447.8	18325.8	0.842954	10.4255		Mean	1	11.48	13.98	14.29	11.71	4.644	14.11
								Std. Deviation	0	1.359	4.409	3.318	3.433	2.16	2.828
n=2			ESM-1	GAPDH	ESM-1/GAPDH	Fold of control		Std. Error of Mean	0	0.6078	1.972	1.484	1.535	0.9661	1.265
	MDA	CTRL	1397.51	18701.4	0.0747278	1
	RT-R-MDA	CTRL	14554.1	18984.2	0.766642	10.2591
		Dig	12960.1	18569.1	0.697939	9.33975
		Bay	17159.8	18906.5	0.907613	12.1456
		SR	16979.5	17234.2	0.985221	13.1841
		AS	6056.67	17056.1	0.355103	4.75196
		AG	14761.1	15862.5	0.930565	12.4527
n=3			ESM-1	GAPDH	ESM-1/GAPDH	Fold of control
	MDA	CTRL	982.378	18732.5	0.0524424	1
	RT-R-MDA	CTRL	11279.7	19208.2	0.587232	11.1976
		Dig	12892.4	19606.8	0.657546	12.5384
		Bay	14483.8	19741.5	0.733672	13.99
		SR	9689.96	16797.8	0.576859	10.9999
		AS	3614.55	16243.2	0.222527	4.24326
		AG	11848.7	15450.3	0.766891	14.6235
n=4			ESM-1	GAPDH	ESM-1/GAPDH	Fold of control
	MDA	CTRL	638.924	18898.7	0.0338079	1
	RT-R-MDA	CTRL	7687.26	18843.4	0.407955	12.0669
		Dig	12066.7	18413.5	0.655315	19.3835
		Bay	11318.7	18626.7	0.607659	17.9739
		SR	7325.96	17426.8	0.420384	12.4345
		AS	843.719	16230.1	0.0519847	1.53765
		AG	9841.67	16273.4	0.604769	17.8884
n=5			ESM-1	GAPDH	ESM-1/GAPDH	Fold of control
	MDA	CTRL	1004.32	19082.9	0.052629	1
	RT-R-MDA	CTRL	13756.1	19329.5	0.711663	13.5222
		Dig	17744.1	18915.9	0.938051	17.8238
		Bay	15953.4	17610.6	0.905895	17.2128
		SR	13838.7	16871.3	0.820248	15.5855
		AS	5968.38	14957.2	0.39903	7.58194
		AG	11216.4	14045.4	0.798581	15.1738

## Sheet: Fig1B
n=1		AS	ESM-1	GAPDH	ESM-1/GAPDH	Fold of control			MDA	RT-R-MDA
	MDA	0	1496.53	17235.3	0.0868295	1		AS	0	0	1	2	4	8	16	24
	RT-R-MDA	0	16425.7	17276.7	0.950743	10.9495		n=1	1	10.9495	11.3263	10.0629	3.32907	1.01335	6.80209	11.6204
		1	16827.8	17111	0.983454	11.3263		n=2	1	11.1993	11.5888	10.7415	5.05543	2.68403	8.81775	12.248
		2	14641.3	16756.7	0.87376	10.0629		n=3	1	13.1295	13.7056	12.0163	6.79315	0.597733	8.02152	13.9847
		4	4690.01	16225	0.289062	3.32907		n=4	1	12.8683	14.0144	12.6104	8.9561	2.07863	10.1817	13.7957
		8	1401.06	15923.3	0.0879884	1.01335		n=5	1	11.5018	11.9763	11.0071	5.48083	3.18361	8.91049	11.694
		16	9182.31	15546.8	0.590622	6.80209		Mean	1	11.93	12.52	11.29	5.923	1.911	8.547	12.67
		24	14915	14782	1.009	11.6204		Std. Deviation	0	0.9997	1.248	1.019	2.1	1.093	1.245	1.143
								Std. Error of Mean	0	0.4471	0.558	0.4559	0.939	0.4887	0.5567	0.5113
n=2		AS	ESM-1	GAPDH	ESM-1/GAPDH	Fold of control
	MDA	0	1434.99	17332.8	0.0827903	1
	RT-R-MDA	0	16566.5	17867.4	0.927193	11.1993
		1	17172	17898	0.959437	11.5888
		2	15549.5	17485.3	0.889295	10.7415
		4	7182.13	17160	0.41854	5.05543
		8	3692.3	16616.1	0.222212	2.68403
		16	11871.8	16262.3	0.730024	8.81775
		24	16058.1	15836.2	1.01402	12.248
n=3		AS	ESM-1	GAPDH	ESM-1/GAPDH	Fold of control
	MDA	0	1304.62	18252.7	0.0714756	1
	RT-R-MDA	0	16424.1	17501.5	0.938439	13.1295
		1	17030.5	17385	0.979614	13.7056
		2	15186.8	17682.3	0.858872	12.0163
		4	8653.01	17821.3	0.485544	6.79315
		8	720.113	16855.3	0.0427234	0.597733
		16	9272.01	16171.8	0.573343	8.02152
		24	16075	16082	0.999568	13.9847
n=4		AS	ESM-1	GAPDH	ESM-1/GAPDH	Fold of control
	MDA	0	1321.27	17976.1	0.0735012	1
	RT-R-MDA	0	15994.8	16910.8	0.945834	12.8683
		1	17256.8	16753	1.03008	14.0144
		2	15856.5	17107.4	0.926881	12.6104
		4	11390.5	17303.4	0.658285	8.9561
		8	2479.6	16229.7	0.152782	2.07863
		16	11438.1	15284.1	0.748367	10.1817
		24	15306.1	15094.8	1.014	13.7957
n=5		AS	ESM-1	GAPDH	ESM-1/GAPDH	Fold of control
	MDA	0	1462.36	18669.2	0.0783299	1
	RT-R-MDA	0	16978.1	18844.9	0.900939	11.5018
		1	17517	18672.7	0.938105	11.9763
		2	15763.5	18283.3	0.862183	11.0071
		4	7728.55	18002.1	0.429313	5.48083
		8	4398.31	17637.5	0.249372	3.18361
		16	12221.1	17509.8	0.697958	8.91049
		24	16265.5	17757.3	0.915992	11.694

## Sheet: Fig1C
n=1		AS	ESM-1	β-actin	ESM-1/β-actin	Fold of control			MDA	RT-R-MDA
	MDA	0	4840.6	18597.3	0.260284	1		AS	0	0	1	2	4	8	16	24
	RT-R-MDA	0	14365.6	18975.2	0.757073	2.90864		n=1	1	2.90864	2.9122	2.28042	1.53612	1.19943	1.26997	1.77684
		1	13582.3	17918.6	0.757999	2.9122		n=2	1	1.66874	1.51803	0.847335	0.522732	0.28736	0.229904	0.697388
		2	10258.4	17282.9	0.593557	2.28042		n=3	1	2.97645	3.22451	3.48974	2.01958	1.46769	2.26206	2.33463
		4	7190.62	17984.3	0.399828	1.53612		n=4	1	1.95262	0.932721	1.34907	0.952182	0.60872	1.51915	1.68103
		8	5479.08	17550.4	0.312192	1.19943		n=5	1	2.98987	2.86263	2.26256	1.58167	1.18545	1.22221	1.79454
		16	7558.03	22864.9	0.330552	1.26997		Mean	1	2.499	2.29	2.046	1.322	0.9497	1.301	1.657
		24	11028.4	23846.1	0.462483	1.77684		Std. Deviation	0	0.6373	1.003	1.014	0.5864	0.4851	0.729	0.5945
								Std. Error of Mean	0	0.285	0.4487	0.4533	0.2622	0.2169	0.326	0.2659
n=2		AS	ESM-1	β-actin	ESM-1/β-actin	Fold of control
	MDA	0	10715.4	25822.4	0.414966	1
	RT-R-MDA	0	13364.3	19299.4	0.692472	1.66874
		1	11201.4	17782	0.629931	1.51803
		2	7214.62	20518.5	0.351615	0.847335
		4	4362.96	20113.6	0.216916	0.522732
		8	2203.18	18476.2	0.119245	0.28736
		16	2215.38	23221.4	0.0954022	0.229904
		24	5891.26	20357.3	0.289392	0.697388
n=3		AS	ESM-1	β-actin	ESM-1/β-actin	Fold of control
	MDA	0	3990.55	22423	0.177967	1
	RT-R-MDA	0	10999.9	20765.9	0.52971	2.97645
		1	13920.9	24258.5	0.573856	3.22451
		2	10647.8	17144.6	0.621059	3.48974
		4	6100.96	16974.5	0.359419	2.01958
		8	4987.72	19095.4	0.2612	1.46769
		16	6589.5	16368.5	0.402571	2.26206
		24	8735.86	21025.6	0.415486	2.33463
n=4		AS	ESM-1	β-actin	ESM-1/β-actin	Fold of control
	MDA	0	8268.55	21824.8	0.37886	1
	RT-R-MDA	0	12544.3	16957	0.739767	1.95262
		1	6611.13	18708.8	0.35337	0.932721
		2	10012.6	19590	0.511107	1.34907
		4	6461.89	17912.7	0.360743	0.952182
		8	4730.72	20513.1	0.23062	0.60872
		16	11197.6	19455.6	0.575546	1.51915
		24	11342.1	17809	0.636875	1.68103
n=5		AS	ESM-1	β-actin	ESM-1/β-actin	Fold of control
	MDA	0	4799.18	18534.6	0.258931	1
	RT-R-MDA	0	14227.6	18377.9	0.77417	2.98987
		1	13499.6	18212.6	0.741222	2.86263
		2	10074	17195.6	0.585845	2.26256
		4	7109.2	17358.9	0.409543	1.58167
		8	5417.38	17649.1	0.30695	1.18545
		16	7478.62	23631.6	0.316467	1.22221
		24	10933.8	23530.8	0.464661	1.79454

## Sheet: Fig1D
n=1		AS	ESM-1	GAPDH	ESM-1/GAPDH	Fold of control			MDA	RT-R-MDA
	MDA	0	1695.6	18546.9	0.0914221	1		AS	0	0	10	50	100	200
	RT-R-MDA	0	18209.7	18817	0.967724	10.5852		n=1	1	10.5852	8.6705	6.49794	5.18029	5.04555
		10	14355.9	18110.7	0.792675	8.6705		n=2	1	10.5262	9.17836	6.9858	6.25118	6.91403
		50	10594.1	17833.4	0.594055	6.49794		n=3	1	12.935	10.137	11.5889	9.70621	8.93981
		100	8801.52	18584.6	0.473593	5.18029		n=4	1	12.1788	9.26067	10.8187	9.7359	8.4823
		200	8362.93	18130	0.461275	5.04555		n=5	1	10.7441	8.56041	6.05525	4.6378	4.43701
								Mean	1	11.39	9.161	8.389	7.102	6.764
n=2		AS	ESM-1	GAPDH	ESM-1/GAPDH	Fold of control		Std. Deviation	0	1.098	0.6253	2.605	2.46	2.005
	MDA	0	1756.26	19588	0.0896596	1		Std. Error of Mean	0	0.4909	0.2797	1.165	1.1	0.8966
	RT-R-MDA	0	18427.2	19525.1	0.943772	10.5262
		10	15709.8	19090.1	0.822928	9.17836
		50	12143.1	19387.2	0.626344	6.9858
		100	10823.5	19311.2	0.560479	6.25118
		200	11144	17976.8	0.61991	6.91403
n=3		AS	ESM-1	GAPDH	ESM-1/GAPDH	Fold of control
	MDA	0	1247.06	18831.5	0.066222	1
	RT-R-MDA	0	16942.3	19778.9	0.856583	12.935
		10	12762.2	19011.4	0.671292	10.137
		50	14496.8	18889.8	0.767439	11.5889
		100	12587.2	19583	0.642764	9.70621
		200	11035.8	18641.2	0.592012	8.93981
n=4		AS	ESM-1	GAPDH	ESM-1/GAPDH	Fold of control
	MDA	0	1405.13	17182.3	0.0817779	1
	RT-R-MDA	0	17612.6	17684.1	0.995959	12.1788
		10	12706.9	16778.9	0.757318	9.26067
		50	14725.2	16643.7	0.88473	10.8187
		100	13207.6	16588.7	0.796181	9.7359
		200	11139.2	16058.4	0.693665	8.4823
n=5		AS	ESM-1	GAPDH	ESM-1/GAPDH	Fold of control
	MDA	0	1748.94	19187.8	0.0911486	1
	RT-R-MDA	0	19051.2	19453.8	0.979306	10.7441
		10	14508.5	18594.2	0.78027	8.56041
		50	10183.5	18450.8	0.551927	6.05525
		100	8203.2	19405.3	0.42273	4.6378
		200	7664.79	18952.2	0.404427	4.43701

## Sheet: Fig1E
n=1		AS	ESM-1	β-actin	ESM-1/β-actin	Fold of control			MDA	RT-R-MDA
	MDA	0	9059.52	18178.9	0.498353	1		AS	0	0	10	50	100	200
	RT-R-MDA	0	21047.8	16948.3	1.24188	2.49196		n=1	1	2.49196	1.5981	0.99983	0.701483	0.450162
		10	20249.4	25425.6	0.796421	1.5981		n=2	1	2.17018	1.21891	1.69759	1.43606	0.850053
		50	9953.45	19976.1	0.498269	0.99983		n=3	1	2.06605	0.857225	0.920271	1.37045	1.15086
		100	5889.45	16846.9	0.349587	0.701483		n=4	1	2.0248	2.01308	1.65019	1.39993	0.511002
		200	4548.89	20276.8	0.22434	0.450162		n=5	1	1.99969	2.03347	1.3029	1.12994	1.01135
								Mean	1	2.151	1.544	1.314	1.208	0.7947
n=2		AS	ESM-1	β-actin	ESM-1/β-actin	Fold of control		Std. Deviation	0	0.2017	0.5099	0.3585	0.3074	0.3066
	MDA	0	10806.9	25375	0.425889	1		Std. Error of Mean	0	0.09018	0.228	0.1603	0.1375	0.1371
	RT-R-MDA	0	21149.9	22883.1	0.924257	2.17018
		10	12646.9	24362.2	0.519119	1.21891
		50	11998.2	16595.4	0.722983	1.69759
		100	10528.6	17214.8	0.611601	1.43606
		200	9410.28	25993.2	0.362028	0.850053
n=3		AS	ESM-1	β-actin	ESM-1/β-actin	Fold of control
	MDA	0	10565.5	26430.1	0.399753	1
	RT-R-MDA	0	18119.6	21938.9	0.825911	2.06605
		10	7892.74	23032.5	0.342678	0.857225
		50	6550.08	17804.9	0.367881	0.920271
		100	10962.4	20010.3	0.547841	1.37045
		200	9560.86	20781.7	0.460061	1.15086
n=4		AS	ESM-1	β-actin	ESM-1/β-actin	Fold of control
	MDA	0	9328.76	22729.4	0.410427	1
	RT-R-MDA	0	11438.9	13764.7	0.831035	2.0248
		10	11351	13738.4	0.826222	2.01308
		50	10355.8	15290.2	0.677284	1.65019
		100	10044.6	17482	0.574568	1.39993
		200	5763.74	27481.8	0.209729	0.511002
n=5		AS	ESM-1	β-actin	ESM-1/β-actin	Fold of control
	MDA	0	13085.1	30132.1	0.434256	1
	RT-R-MDA	0	14484.3	16679.8	0.868377	1.99969
		10	14863.4	16832	0.883047	2.03347
		50	9263.28	16372.2	0.565793	1.3029
		100	10772	21953.1	0.490682	1.12994
		200	9134.74	20799.4	0.439183	1.01135

## Sheet: Fig1F
OD450nm	AS (nM, 24 h)
RT-MDA	0	10	50	100	200
n=1	0.7347	0.6928	0.6845	0.6735	0.6341
n=2	0.7346	0.7214	0.6989	0.6589	0.6514
n=3	0.717	0.7017	0.6583	0.6692	0.6835
n=4	0.6983	0.6999	0.6559	0.6472	0.6199
n=5	0.6344	0.6482	0.6518	0.6223	0.6112
Fold of control	AS (nM, 24 h)
RT-MDA	0	10	50	100	200
n=1	1	0.94297	0.931673	0.916701	0.863073
n=2	1	0.982031	0.951402	0.896951	0.886741
n=3	1	0.978661	0.918131	0.933333	0.953278
n=4	1	1.00229	0.939281	0.926822	0.887727
n=5	1	1.02175	1.02743	0.980927	0.96343
Mean	1	0.9856	0.9536	0.9309	0.9108
Std. Deviation	0	0.02943	0.043	0.03112	0.04462
Std. Error of Mean	0	0.01316	0.01923	0.01392	0.01995

## Sheet: Fig2A
n=1	CE	SP	FoxO1	β-actin	FoxO1/β-actin	Fold of control		CE	RT-R-MDA
	RT-R-MDA	0	10266.6	27006.6	0.380153	1		SP	0	0.5	1	2	4	8
		0.5	12800.1	27776.7	0.46082	1.21219		n=1	1	1.21219	2.75096	3.32703	2.85186	1.16937
		1	22775.5	21778.3	1.04579	2.75096		n=2	1	1.09681	1.90598	2.47444	1.74068	1.04625
		2	25085	19833.5	1.26478	3.32703		n=3	1	0.944722	2.00382	1.8164	1.3347	1.03659
		4	22286.1	20556.3	1.08414	2.85186		n=4	1	0.829129	1.90568	2.05438	1.4583	0.759856
		8	12298.4	27665.4	0.444541	1.16937		n=5	1	0.96326	2.0568	2.24387	2.20041	1.2638
								Mean	1	1.009	2.125	2.383	1.917	1.055
n=2	CE	SP	FoxO1	β-actin	FoxO1/β-actin	Fold of control		Std. Deviation	0	0.148	0.3561	0.5805	0.6194	0.1899
	RT-R-MDA	0	8669.23	18352.5	0.472374	1		Std. Error of Mean	0	0.06617	0.1593	0.2596	0.277	0.08491
		0.5	9867.93	19046.3	0.518102	1.09681
		1	20528.7	22801.1	0.900335	1.90598
		2	25318.6	21660.9	1.16886	2.47444
		4	20631.1	25091	0.822252	1.74068
		8	12625.8	25546.9	0.494221	1.04625
n=3	CE	SP	FoxO1	β-actin	FoxO1/β-actin	Fold of control
	RT-R-MDA	0	14030.5	22005.3	0.637594	1
		0.5	14461.3	24008.2	0.602349	0.944722
		1	29806	23329.2	1.27763	2.00382
		2	30735.5	26539	1.15812	1.8164
		4	21775.1	25587.7	0.850997	1.3347
		8	15945.6	24126.3	0.660922	1.03659
n=4	CE	SP	FoxO1	β-actin	FoxO1/β-actin	Fold of control
	RT-R-MDA	0	12890.6	20129.2	0.640392	1
		0.5	12821.8	24148.1	0.530968	0.829129
		1	30646.3	25112.1	1.22038	1.90568
		2	34614.5	26310.6	1.31561	2.05438
		4	25123.1	26901.8	0.93388	1.4583
		8	11816.2	24283	0.486606	0.759856
n=5	CE	SP	FoxO1	β-actin	FoxO1/β-actin	Fold of control
	RT-R-MDA	0	10630.5	20037.7	0.530526	1
		0.5	10872.9	21276.2	0.511034	0.96326
		1	27144.1	24875.8	1.09118	2.0568
		2	33057.9	27769.6	1.19043	2.24387
		4	30374.2	26019.2	1.16738	2.20041
		8	15935	23766.6	0.670479	1.2638
n=1	NE	SP	FoxO1	PCNA	FoxO1/PCNA	Fold of control		NE	RT-R-MDA
	RT-R-MDA	0	15414.8	25767	0.598238	1		SP	0	0.5	1	2	4	8
		0.5	6135	27376.3	0.224099	0.374599		n=1	1	0.374599	0.343944	0.685209	1.06006	1.36601
		1	6223.64	30247.1	0.20576	0.343944		n=2	1	0.421803	0.329461	0.44766	0.748057	1.1026
		2	11513	28086	0.409918	0.685209		n=3	1	0.432443	0.365173	0.508815	0.614482	1.04514
		4	18966.2	29907.2	0.634169	1.06006		n=4	1	0.493039	0.440354	0.550034	0.841087	1.19036
		8	23993	29360	0.8172	1.36601		n=5	1	0.631782	0.394501	0.662537	0.816916	1.14314
								Mean	1	0.4707	0.3747	0.5709	0.8161	1.169
n=2	NE	SP	FoxO1	PCNA	FoxO1/PCNA	Fold of control		Std. Deviation	0	0.09942	0.04412	0.1012	0.1623	0.1222
	RT-R-MDA	0	14384.1	15898.9	0.904726	1		Std. Error of Mean	0	0.04446	0.01973	0.04524	0.0726	0.05463
		0.5	6401.64	16775.1	0.381616	0.421803
		1	6438.83	21601.6	0.298071	0.329461
		2	10103.4	24946.1	0.40501	0.44766
		4	17499.2	25856.3	0.676786	0.748057
		8	27867.9	27936.3	0.997549	1.1026
n=3	NE	SP	FoxO1	PCNA	FoxO1/PCNA	Fold of control
	RT-R-MDA	0	18908.2	18812.2	1.00511	1
		0.5	10323.6	23751.5	0.434652	0.432443
		1	9648.12	26286.4	0.367038	0.365173
		2	13192	25795.1	0.511414	0.508815
		4	18552.2	30038.2	0.617621	0.614482
		8	27255.9	25946.2	1.05048	1.04514
n=4	NE	SP	FoxO1	PCNA	FoxO1/PCNA	Fold of control
	RT-R-MDA	0	21059.7	25477.3	0.826606	1
		0.5	11547.3	28333.4	0.407549	0.493039
		1	10144.9	27870.5	0.364	0.440354
		2	11562.8	25431.6	0.454662	0.550034
		4	21114.2	30369.3	0.695248	0.841087
		8	27932.1	28387.4	0.983962	1.19036
n=5	NE	SP	FoxO1	PCNA	FoxO1/PCNA	Fold of control
	RT-R-MDA	0	15860.1	20357.4	0.779079	1
		0.5	10915.5	22176.7	0.492208	0.631782
		1	7578.12	24656.6	0.307347	0.394501
		2	12040.3	23326.3	0.516169	0.662537
		4	16084.8	25273.1	0.636442	0.816916
		8	25944.1	29131.1	0.890597	1.14314

## Sheet: Fig2B
n=1	CE	SB	FoxO1	β-actin	FoxO1/β-actin	Fold of control		CE	RT-R-MDA
	RT-R-MDA	0	13358	23531.5	0.567664	1		SB	0	0.5	1	2	4	8
		0.5	16514.8	27182.8	0.607547	1.07026		n=1	1	1.07026	1.28915	2.1383	1.00553	0.728623
		1	20807.2	28432.6	0.731807	1.28915		n=2	1	0.93952	1.51932	3.15598	2.11358	1.92633
		2	35874.5	29554.6	1.21384	2.1383		n=3	1	1.25329	2.06963	2.72745	3.3084	2.18719
		4	16087.5	28183.9	0.570803	1.00553		n=4	1	1.099	1.79879	2.49449	2.33423	1.41601
		8	10823.9	26169	0.413613	0.728623		n=5	1	1.13799	1.50405	1.94159	1.25367	1.41187
								Mean	1	1.1	1.636	2.492	2.003	1.534
n=2	CE	SB	FoxO1	β-actin	FoxO1/β-actin	Fold of control		Std. Deviation	0	0.1136	0.3024	0.4807	0.9196	0.5608
	RT-R-MDA	0	10613.6	29939.6	0.3545	1		Std. Error of Mean	0	0.05078	0.1353	0.215	0.4112	0.2508
		0.5	9168.71	27528.8	0.333059	0.93952
		1	14703.5	27299.6	0.5386	1.51932
		2	24847	22208.8	1.11879	3.15598
		4	19599.5	26158.4	0.749263	2.11358
		8	16216.6	23747.2	0.682883	1.92633
n=3	CE	SB	FoxO1	β-actin	FoxO1/β-actin	Fold of control
	RT-R-MDA	0	13297	29911.1	0.44455	1
		0.5	15764.5	28295	0.557149	1.25329
		1	23184.8	25199.3	0.920054	2.06963
		2	28250	23299.1	1.21249	2.72745
		4	27387.2	18621.2	1.47075	3.3084
		8	24032.9	24717.1	0.972316	2.18719
n=4	CE	SB	FoxO1	β-actin	FoxO1/β-actin	Fold of control
	RT-R-MDA	0	12467.1	25394	0.490947	1
		0.5	14985	27773.1	0.539549	1.099
		1	25106.4	28429.5	0.883109	1.79879
		2	29877.1	24396.2	1.22466	2.49449
		4	23549.2	20549.3	1.14598	2.33423
		8	13805.2	19858.3	0.695185	1.41601
n=5	CE	SB	FoxO1	β-actin	FoxO1/β-actin	Fold of control
	RT-R-MDA	0	18036.2	25834.8	0.698136	1
		0.5	22982.3	28927.7	0.794473	1.13799
		1	27567.7	26254.2	1.05003	1.50405
		2	30908.2	22802.2	1.35549	1.94159
		4	17286.4	19750.6	0.875233	1.25367
		8	18755.6	19028.2	0.985675	1.41187
n=1	NE	SB	FoxO1	PCNA	FoxO1/PCNA	Fold of control		NE	RT-R-MDA
	RT-R-MDA	0	21800.1	26061	0.836502	1		SB	0	0.5	1	2	4	8
		0.5	12174.1	27370.9	0.444783	0.531718		n=1	1	0.531718	0.469712	0.517412	0.537794	0.890322
		1	11901.1	30289.2	0.392915	0.469712		n=2	1	0.717409	0.579204	0.469342	0.592566	1.06972
		2	12997.7	30030.4	0.432816	0.517412		n=3	1	0.674825	0.527769	0.524509	0.764553	1.35316
		4	12901.1	28677.7	0.449866	0.537794		n=4	1	0.793488	0.639018	0.862235	0.952447	1.33945
		8	22674.9	30446.1	0.744756	0.890322		n=5	1	0.579305	0.418488	0.641204	0.733045	1.18783
								Mean	1	0.6593	0.5268	0.6029	0.7161	1.168
n=2	NE	SB	FoxO1	PCNA	FoxO1/PCNA	Fold of control		Std. Deviation	0	0.1052	0.08708	0.1581	0.1624	0.1942
	RT-R-MDA	0	21131.4	27215.1	0.776459	1		Std. Error of Mean	0	0.04706	0.03894	0.07072	0.07265	0.08684
		0.5	15522.1	27865.4	0.557038	0.717409
		1	13768.5	30615.2	0.449728	0.579204
		2	10673.1	29287.6	0.364424	0.469342
		4	13635.2	29635.2	0.460103	0.592566
		8	23377.1	28144.9	0.830595	1.06972
n=3	NE	SB	FoxO1	PCNA	FoxO1/PCNA	Fold of control
	RT-R-MDA	0	21671.2	20716.5	1.04608	1
		0.5	17807.7	25226.1	0.705924	0.674825
		1	14341	25975.7	0.552091	0.527769
		2	14452.6	26340.6	0.54868	0.524509
		4	19129.1	23917.7	0.799787	0.764553
		8	25066.7	17708.5	1.41552	1.35316
n=4	NE	SB	FoxO1	PCNA	FoxO1/PCNA	Fold of control
	RT-R-MDA	0	16939.4	27391.5	0.618417	1
		0.5	14366.2	29276.6	0.490706	0.793488
		1	11861.2	30014.8	0.395179	0.639018
		2	13644.9	25589.6	0.53322	0.862235
		4	15878.2	26957.4	0.589009	0.952447
		8	22060.5	26632.3	0.828336	1.33945
n=5	NE	SB	FoxO1	PCNA	FoxO1/PCNA	Fold of control
	RT-R-MDA	0	21541.7	25176.9	0.855613	1
		0.5	11669.4	23543.2	0.495661	0.579305
		1	11248	31413.4	0.358064	0.418488
		2	12861.1	23442.4	0.548623	0.641204
		4	14120.1	22512.9	0.627203	0.733045
		8	24421.1	24028.9	1.01632	1.18783

## Sheet: Fig2C
n=1	CE	PD	FoxO1	β-actin	FoxO1/β-actin	Fold of control		CE	RT-R-MDA
	RT-R-MDA	0	12338.1	18376.9	0.671391	1		PD	0	0.5	1	2	4	8
		0.5	15323.4	17452.6	0.878002	1.30774		n=1	1	1.30774	1.28746	1.71579	1.47948	1.06169
		1	17187.8	19884.3	0.86439	1.28746		n=2	1	1.23115	1.28178	1.36739	1.26933	1.20987
		2	20590.1	17873.9	1.15196	1.71579		n=3	1	1.35971	1.28352	1.49875	1.41799	1.28836
		4	22688	22840.9	0.993306	1.47948		n=4	1	1.13603	1.04811	1.47851	1.90367	1.37405
		8	20857.9	29261.4	0.712811	1.06169		n=5	1	1.13837	0.832841	0.792319	1.36179	1.48035
								Mean	1	1.235	1.147	1.371	1.486	1.283
n=2	CE	PD	FoxO1	β-actin	FoxO1/β-actin	Fold of control		Std. Deviation	0	0.09999	0.2031	0.347	0.2457	0.1594
	RT-R-MDA	0	16685.4	27185.6	0.61376	1		Std. Error of Mean	0	0.04472	0.09083	0.1552	0.1099	0.07127
		0.5	22606	29916.7	0.755631	1.23115
		1	23465.2	29827.2	0.786704	1.28178
		2	25002.5	29791.5	0.839248	1.36739
		4	24337.6	31239.6	0.779063	1.26933
		8	23453.3	31584.1	0.742568	1.20987
n=3	CE	PD	FoxO1	β-actin	FoxO1/β-actin	Fold of control
	RT-R-MDA	0	17238.2	30607.3	0.563206	1
		0.5	21789	28452.6	0.765799	1.35971
		1	23585.2	32626.4	0.722888	1.28352
		2	21961.3	26017.3	0.844103	1.49875
		4	24037.6	30098.9	0.798619	1.41799
		8	20031.5	27606.2	0.725614	1.28836
n=4	CE	PD	FoxO1	β-actin	FoxO1/β-actin	Fold of control
	RT-R-MDA	0	20902.1	23854.6	0.876227	1
		0.5	20452.6	20546.8	0.995417	1.13603
		1	18964.3	20649.7	0.918382	1.04811
		2	21806.1	16832	1.29551	1.47851
		4	28967.3	17366	1.66805	1.90367
		8	23984.2	19920.7	1.20398	1.37405
n=5	CE	PD	FoxO1	β-actin	FoxO1/β-actin	Fold of control
	RT-R-MDA	0	22301.6	24289	0.918178	1
		0.5	21259.7	20339.8	1.04523	1.13837
		1	19568.1	25589.3	0.764697	0.832841
		2	22381.1	30764.7	0.72749	0.792319
		4	28178.1	22536	1.25036	1.36179
		8	22434.4	16505.3	1.35922	1.48035
n=1	NE	PD	FoxO1	PCNA	FoxO1/PCNA	Fold of control		NE	RT-R-MDA
	RT-R-MDA	0	18441.2	23093.4	0.798548	1		PD	0	0.5	1	2	4	8
		0.5	20428.1	29756.5	0.686509	0.859697		n=1	1	0.859697	0.988413	1.30772	1.57078	1.44289
		1	19150	24262.1	0.789295	0.988413		n=2	1	1.11368	1.17493	1.39622	1.49466	1.60641
		2	19987.8	19140.4	1.04428	1.30772		n=3	1	1.03482	1.22608	1.21182	1.42878	1.39786
		4	23269.7	18551.2	1.25435	1.57078		n=4	1	0.534328	0.627734	0.858335	0.661228	0.610712
		8	21516.3	18673.8	1.15222	1.44289		n=5	1	0.620297	0.741252	0.819424	0.457529	0.643304
								Mean	1	0.8326	0.9517	1.119	1.123	1.14
n=2	NE	PD	FoxO1	PCNA	FoxO1/PCNA	Fold of control		Std. Deviation	0	0.2523	0.2625	0.264	0.5216	0.475
	RT-R-MDA	0	17502.7	26469.2	0.661249	1		Std. Error of Mean	0	0.1128	0.1174	0.1181	0.2333	0.2124
		0.5	20948.5	28446.5	0.736418	1.11368
		1	21283.5	27394.8	0.776919	1.17493
		2	24080.6	26082.4	0.923249	1.39622
		4	30188.4	30544.6	0.98834	1.49466
		8	29941.9	28187.6	1.06224	1.60641
n=3	NE	PD	FoxO1	PCNA	FoxO1/PCNA	Fold of control
	RT-R-MDA	0	16736.2	26388.5	0.634222	1
		0.5	19073	29061	0.656307	1.03482
		1	19857	25536.1	0.777606	1.22608
		2	19782	25738.9	0.768565	1.21182
		4	23704.7	26159.4	0.906164	1.42878
		8	24087.8	27170.2	0.886552	1.39786
n=4	NE	PD	FoxO1	PCNA	FoxO1/PCNA	Fold of control
	RT-R-MDA	0	25472	18817.5	1.35363	1
		0.5	16974.6	23468.9	0.723281	0.534328
		1	19929.3	23454	0.849719	0.627734
		2	23206.9	19973.8	1.16187	0.858335
		4	22241.3	24849	0.895057	0.661228
		8	25068.3	30324.2	0.826677	0.610712
n=5	NE	PD	FoxO1	PCNA	FoxO1/PCNA	Fold of control
	RT-R-MDA	0	31892.4	28307.4	1.12665	1
		0.5	17867.2	25566.4	0.698856	0.620297
		1	22352.3	26765.1	0.835129	0.741252
		2	22986	24898.2	0.923201	0.819424
		4	15949.5	30941.5	0.515473	0.457529
		8	22632	31226.2	0.724777	0.643304

## Sheet: Fig2D
n=1			ESM-1	GAPDH	ESM-1/GAPDH	Fold of control			MDA	RT-MDA
	MDA	CTRL	3356.33	29518.7	0.113702	1			CTRL	CTRL	SP	SB	PD
	RT-MDA	CTRL	28213.4	28776.7	0.980428	8.6228		n=1	1	8.6228	4.3601	6.0876	10.5083
		SP	14692	29635.9	0.495751	4.3601		n=2	1	6.99336	3.85052	4.31488	6.0587
		SB	17965.9	25955.8	0.692172	6.0876		n=3	1	8.13886	4.4181	4.78134	6.66166
		PD	27108.4	22688.5	1.19481	10.5083		n=4	1	8.36743	4.21735	3.99049	10.9207
								n=5	1	7.58333	3.5374	2.82477	6.35336
n=2			ESM-1	GAPDH	ESM-1/GAPDH	Fold of control		Mean	1	7.941	4.077	4.4	8.101
	MDA	CTRL	4020.2	25978.3	0.154752	1		Std. Deviation	0	0.6542	0.3737	1.188	2.4
	RT-MDA	CTRL	29462.3	27223.5	1.08224	6.99336		Std. Error of Mean	0	0.2926	0.1671	0.5315	1.073
		SP	16939.6	28428.1	0.595876	3.85052
		SB	18925.3	28342.5	0.667737	4.31488
		PD	26420.7	28179.2	0.937597	6.0587
n=3			ESM-1	GAPDH	ESM-1/GAPDH	Fold of control
	MDA	CTRL	3589.5	27308.2	0.131444	1
	RT-MDA	CTRL	29400.3	27482	1.0698	8.13886
		SP	16823.7	28969.9	0.580732	4.4181
		SB	16947.9	26966.5	0.628479	4.78134
		PD	22203	25356.4	0.875636	6.66166
n=4			ESM-1	GAPDH	ESM-1/GAPDH	Fold of control
	MDA	CTRL	3367.38	29030.7	0.115994	1
	RT-MDA	CTRL	27665.4	28504.3	0.970568	8.36743
		SP	14457.1	29553.5	0.489186	4.21735
		SB	12643	27314.3	0.462872	3.99049
		PD	27231.9	21497.7	1.26674	10.9207
n=5			ESM-1	GAPDH	ESM-1/GAPDH	Fold of control
	MDA	CTRL	3756.67	28970.3	0.129673	1
	RT-MDA	CTRL	28725.7	29212	0.983354	7.58333
		SP	13500.7	29432.1	0.458706	3.5374
		SB	10405.9	28408.4	0.366297	2.82477
		PD	22609.7	27443.6	0.823859	6.35336

[truncated: 23 more sheets: Fig2E, Fig3A, Fig3B, Fig3C, Fig3D, Fig4A, Fig4B, Fig4C, Fig4D, Fig5A, Fig5B, Fig5C, Fig5D, Fig5E, Fig6A, Fig6B, Fig6C, Fig7A, Fig7B, Fig7C …]
